# Supplementary material for: Insights into the binding and covalent inhibition mechanism of PF-07321332 to SARS-CoV-2 M pro
Source: Royal Society of Chemistry journal article supplement (doi:10.1039/d1ra08752e), 2022-01-01
Supplement: d1ra08752e2.pdf [file d1ra08752e2.pdf]

## Supporting information

### Insights into the Binding and Covalent Inhibition Mechanism of PF-07321332 to SARS-CoV2 Mpro

Son Tung Ngo,<sup>a,b,\*</sup> Trung Hai Nguyen,<sup>a,b</sup> Nguyen Thanh Tung,<sup>c,d</sup> and Binh Khanh Mai<sup>e,\*</sup>

<sup>a</sup>Laboratory of Theoretical and Computational Biophysics, Ton Duc Thang University, Ho Chi Minh City 72915, Vietnam

<sup>b</sup>Faculty of Applied Sciences, Ton Duc Thang University, Ho Chi Minh City 72915, Vietnam

<sup>c</sup>Institute of Materials Science, Vietnam Academy of Science and Technology, 11307 Hanoi, Vietnam

<sup>d</sup>Graduate University of Science and Technology, Vietnam Academy of Science and Technology, 11307 Hanoi, Vietnam

<sup>e</sup>Department of Chemistry, University of Pittsburgh, Pittsburgh, PA, 15260, USA

\*Email: [ngosontung@tdtu.edu.vn](mailto:ngosontung@tdtu.edu.vn) and [binh.mai@pitt.edu](mailto:binh.mai@pitt.edu)

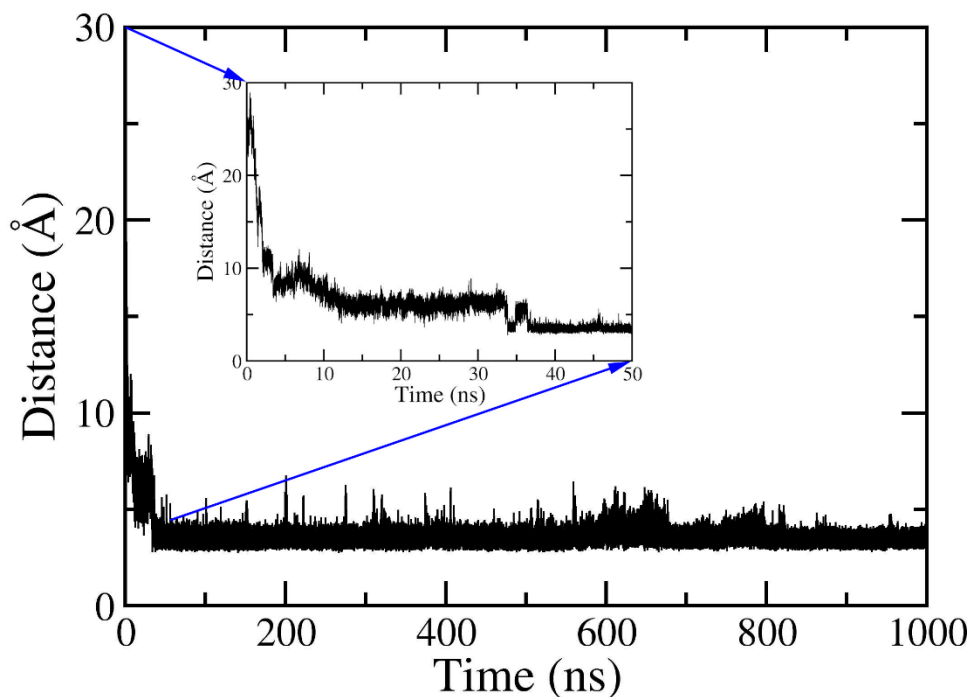

**Figure S1.** The minimum distance between non-hydrogen atoms of PF-07321332 and non-hydrogen atoms of the catalytic dyad (His41 and Cys145 residues). The results were obtained due to analyzing trajectory 0 over 50 ns (zoomed figure) and 1000 ns of SMD simulations. When the distance is smaller than 4.5 Å, the ligand reached the binding pocket of SARS-CoV-2 Mpro.

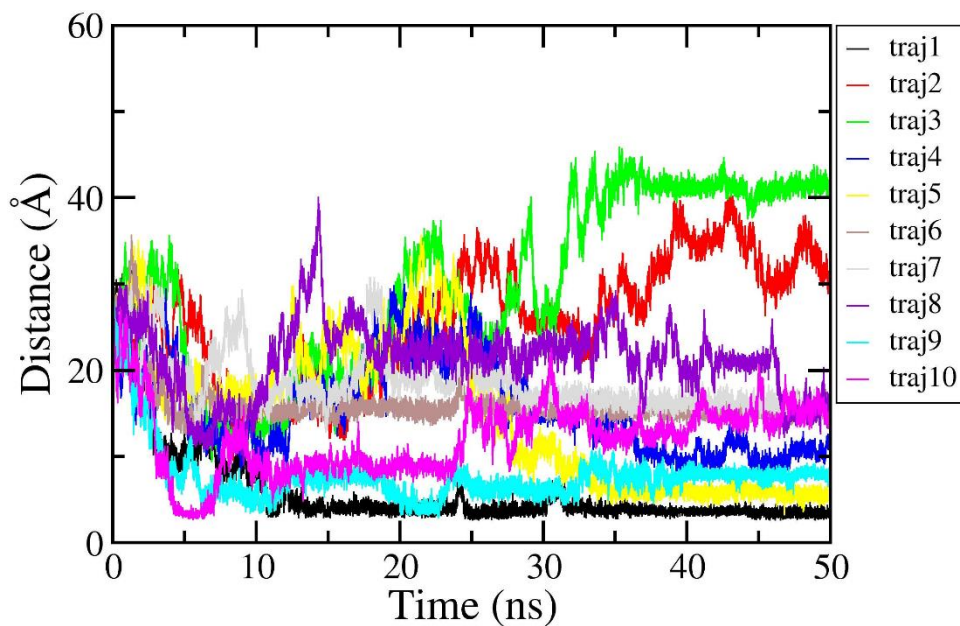

**Figure S2.** The minimum distance between non-hydrogen atoms of PF-07321332 and non-hydrogen atoms of the catalytic dyad (His41 and Cys145 residues). The results were obtained due to analyzing trajectories 1-10. When the distance is smaller than 4.5 Å, the ligand reached the binding pocket of SARS-CoV-2 Mpro.

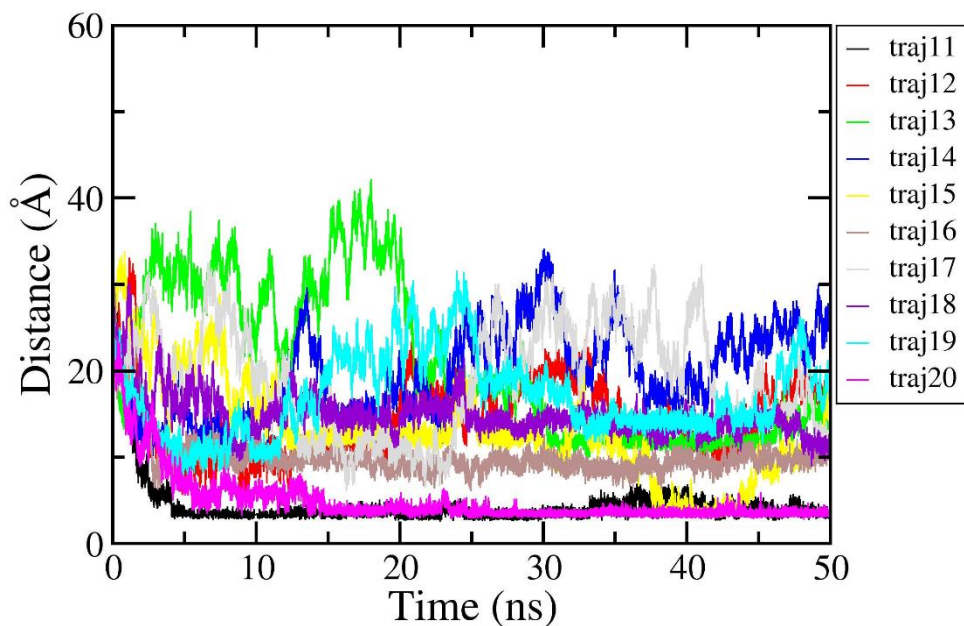

**Figure S3.** The minimum distance between non-hydrogen atoms of PF-07321332 and non-hydrogen atoms of the catalytic dyad (His41 and Cys145 residues). The results were obtained due to analyzing trajectories 11-20. When the distance is smaller than 4.5 Å, the ligand reached the binding pocket of SARS-CoV-2 Mpro.

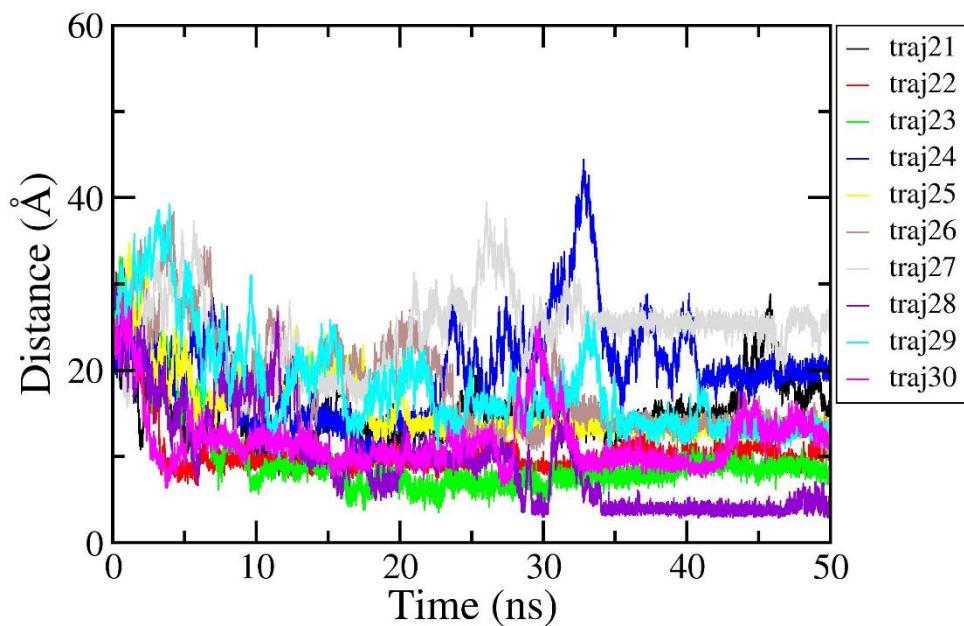

**Figure S4.** The minimum distance between non-hydrogen atoms of PF-07321332 and non-hydrogen atoms of the catalytic dyad (His41 and Cys145 residues). The results were obtained due to analyzing trajectories 21-30. When the distance is smaller than 4.5 Å, the ligand reached the binding pocket of SARS-CoV-2 Mpro.

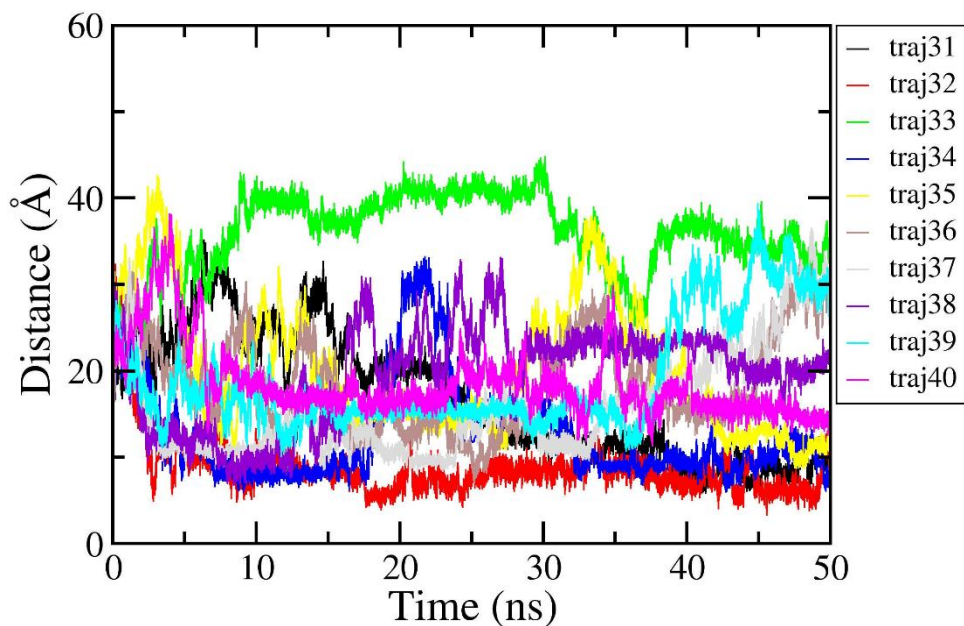

**Figure S5.** The minimum distance between non-hydrogen atoms of PF-07321332 and non-hydrogen atoms of the catalytic dyad (His41 and Cys145 residues). The results were obtained due to analyzing trajectories 31-40. When the distance is smaller than 4.5 Å, the ligand reached the binding pocket of SARS-CoV-2 Mpro.

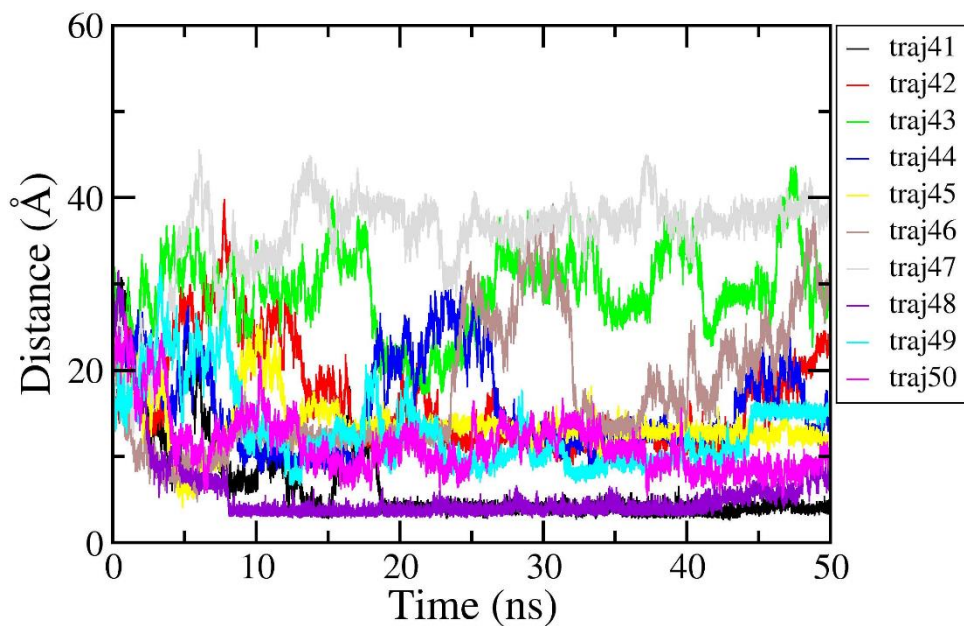

**Figure S6.** The minimum distance between non-hydrogen atoms of PF-07321332 and non-hydrogen atoms of the catalytic dyad (His41 and Cys145 residues). The results were obtained due to analyzing trajectories 41-50. When the distance is smaller than 4.5 Å, the ligand reached the binding pocket of SARS-CoV-2 Mpro.

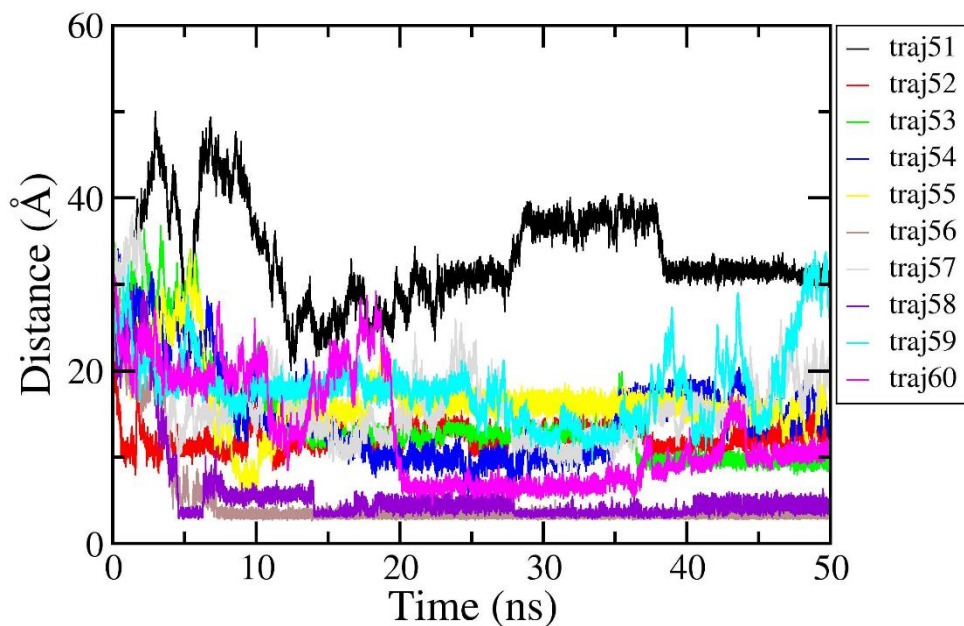

**Figure S7.** The minimum distance between non-hydrogen atoms of PF-07321332 and non-hydrogen atoms of the catalytic dyad (His41 and Cys145 residues). The results were obtained due to analyzing trajectories 51-60. When the distance is smaller than 4.5 Å, the ligand reached the binding pocket of SARS-CoV-2 Mpro.

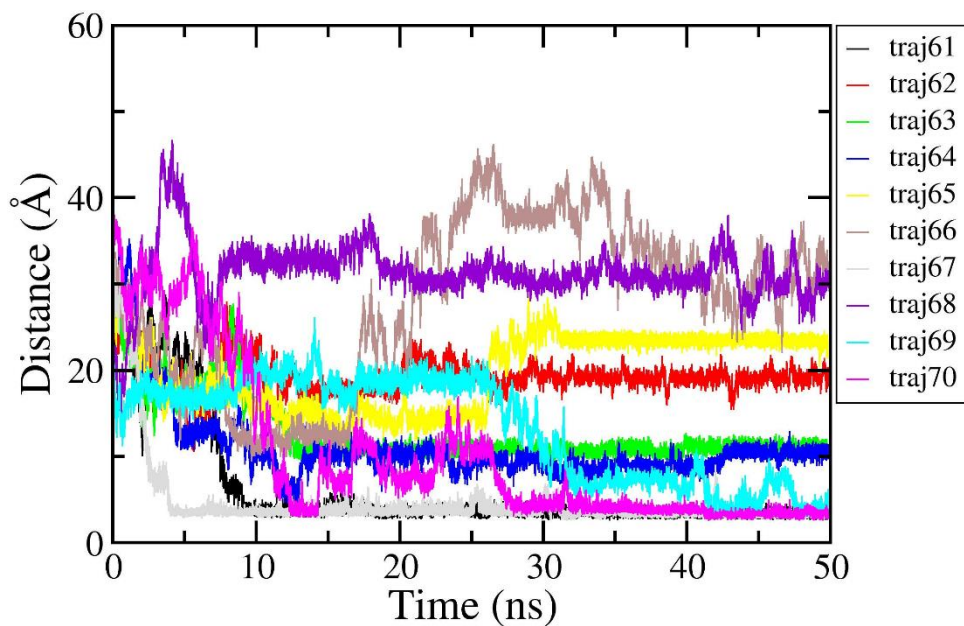

**Figure S8.** The minimum distance between non-hydrogen atoms of PF-07321332 and non-hydrogen atoms of the catalytic dyad (His41 and Cys145 residues). The results were obtained due to analyzing trajectories 61-70. When the distance is smaller than 4.5 Å, the ligand reached the binding pocket of SARS-CoV-2 Mpro.

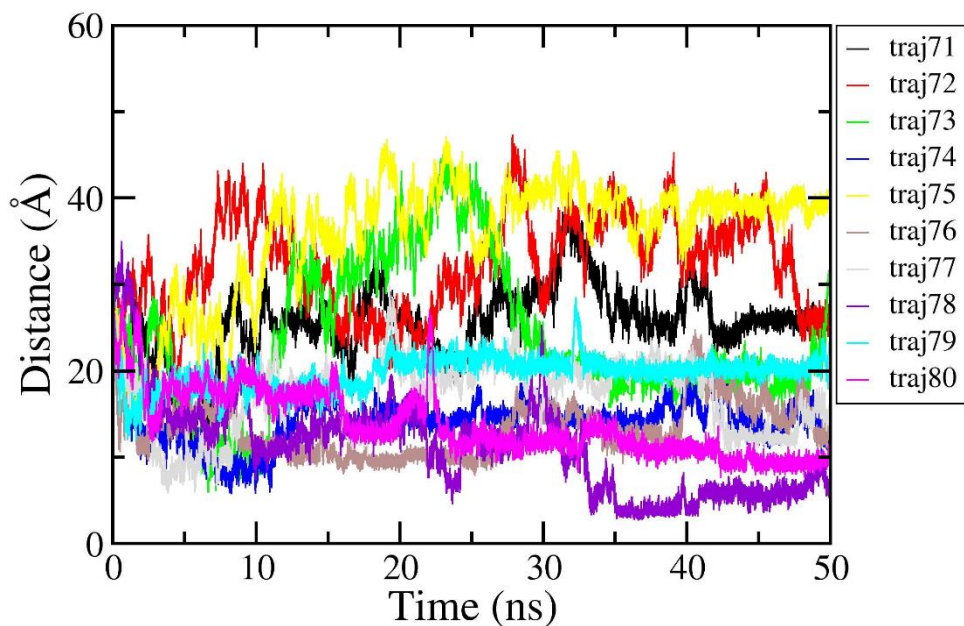

**Figure S9.** The minimum distance between non-hydrogen atoms of PF-07321332 and non-hydrogen atoms of the catalytic dyad (His41 and Cys145 residues). The results were obtained due to analyzing trajectories 71-80. When the distance is smaller than 4.5 Å, the ligand reached the binding pocket of SARS-CoV-2 Mpro.

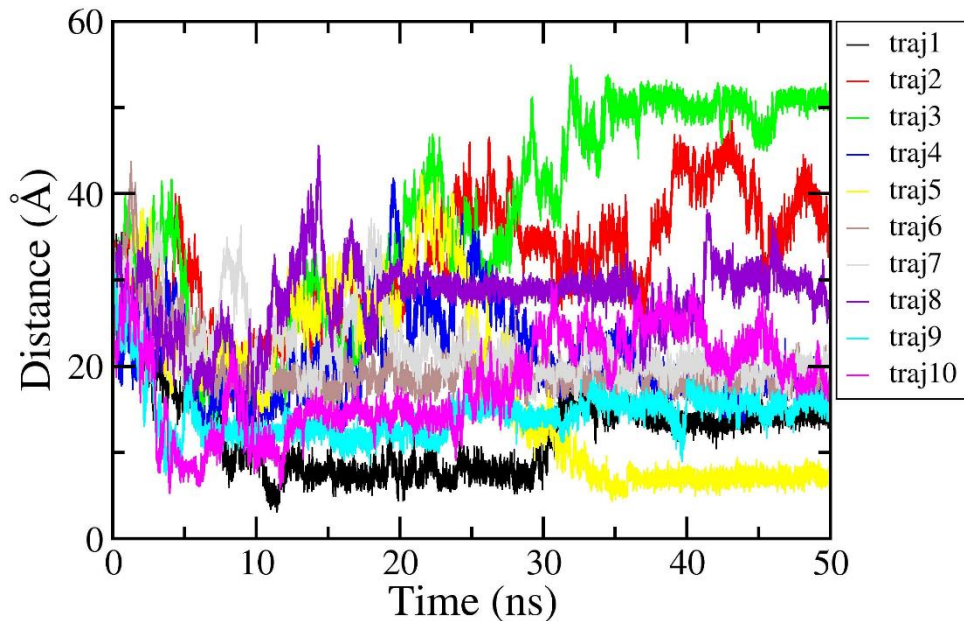

**Figure S10.** The minimum distance  $d_{SY-CN}$  between the nitrile group of PF-07321332 and the sulfur atom of the residue Cys145. The results were obtained due to analyzing trajectories 1-10. When the distance is smaller than 4.5 Å, the ligand reached the *bound* state.

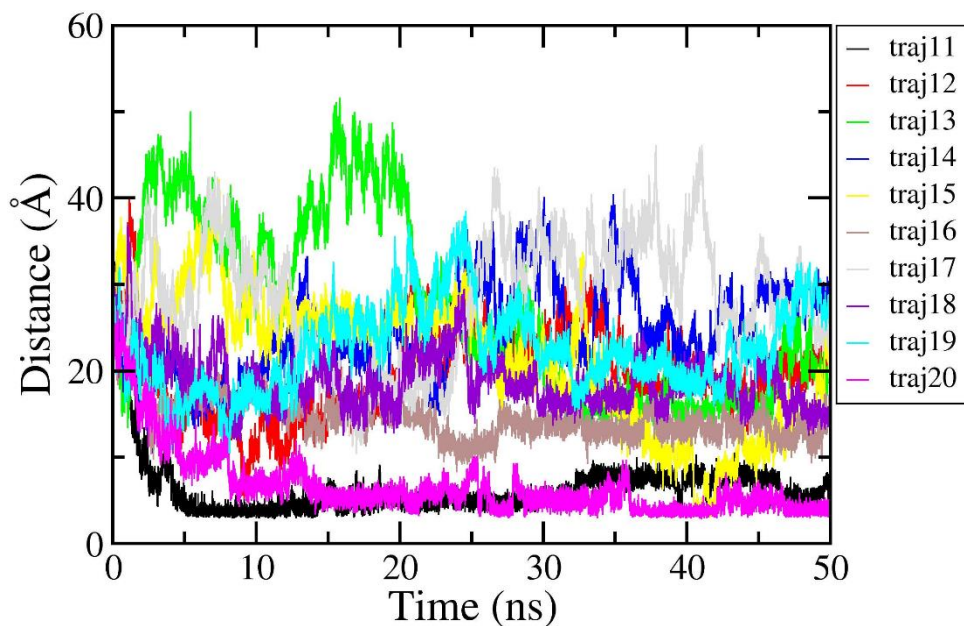

**Figure S11.** The minimum distance  $d_{SY-CN}$  between the nitrile group of PF-07321332 and the sulfur atom of the residue Cys145. The results were obtained due to analyzing trajectories 11-20. When the distance is smaller than 4.5 Å, the ligand reached the *bound* state.

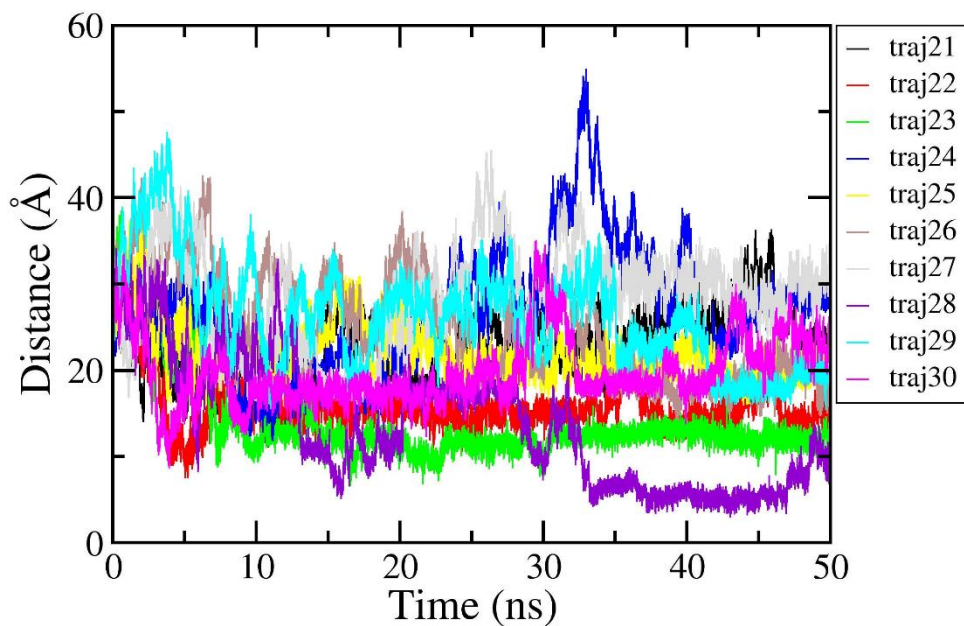

**Figure S12.** The minimum distance  $d_{SY-CN}$  between the nitrile group of PF-07321332 and the sulfur atom of the residue Cys145. The results were obtained due to analyzing trajectories 21-30. When the distance is smaller than 4.5 Å, the ligand reached the *bound* state.

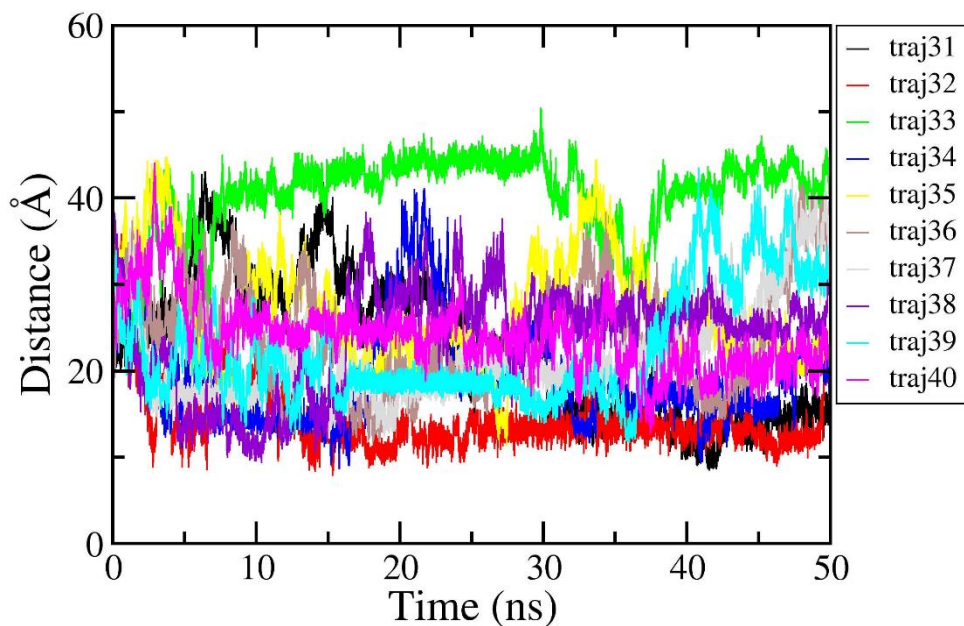

**Figure S13.** The minimum distance  $d_{SY-CN}$  between the nitrile group of PF-07321332 and the sulfur atom of the residue Cys145. The results were obtained due to analyzing trajectories 31-40. When the distance is smaller than 4.5 Å, the ligand reached the *bound* state.

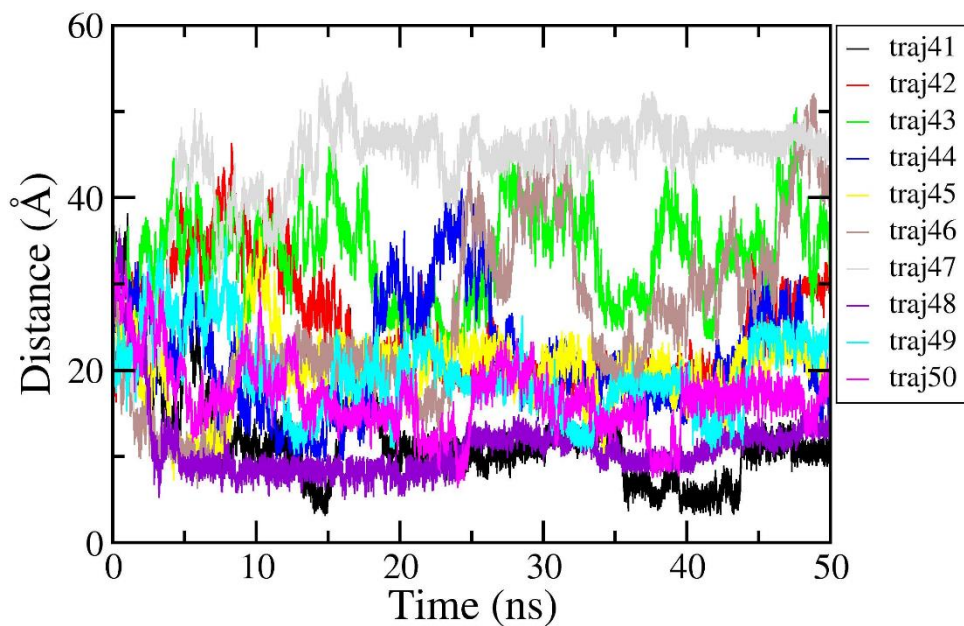

**Figure S14.** The minimum distance  $d_{SY-CN}$  between the nitrile group of PF-07321332 and the sulfur atom of the residue Cys145. The results were obtained due to analyzing trajectories 41-50. When the distance is smaller than 4.5 Å, the ligand reached the *bound* state.



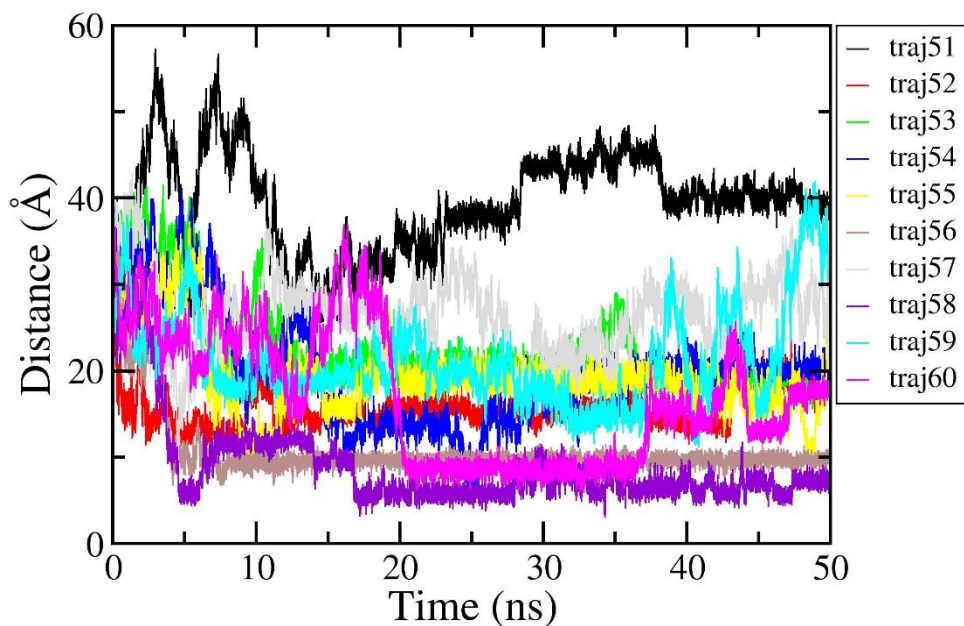

**Figure S15.** The minimum distance  $d_{SY-CN}$  between the nitrile group of PF-07321332 and the sulfur atom of the residue Cys145. The results were obtained due to analyzing trajectories 51-60. When the distance is smaller than 4.5 Å, the ligand reached the *bound* state.

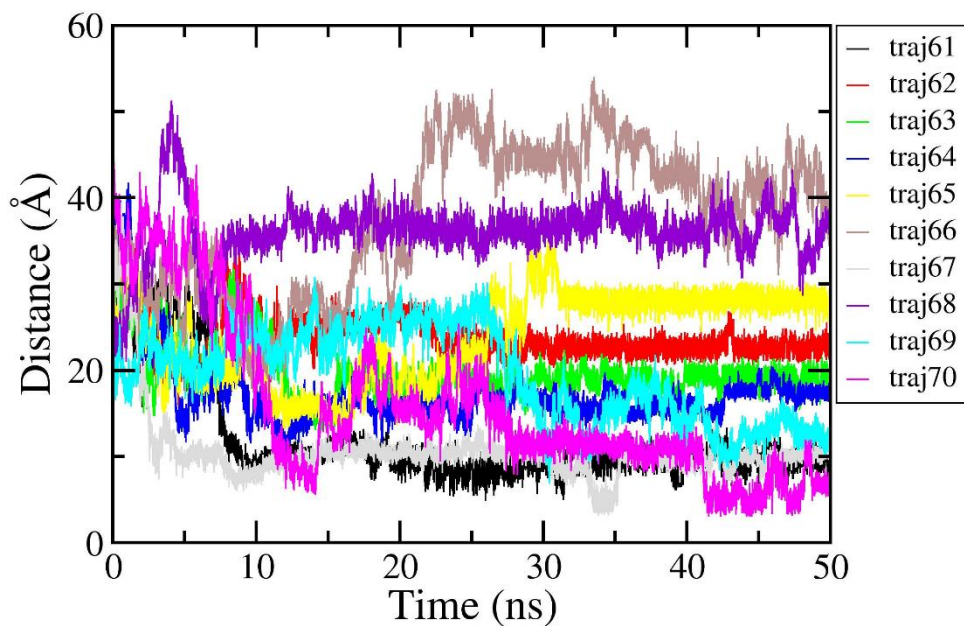

**Figure S16.** The minimum distance  $d_{SY-CN}$  between the nitrile group of PF-07321332 and the sulfur atom of the residue Cys145. The results were obtained due to analyzing trajectories 61-70. When the distance is smaller than 4.5 Å, the ligand reached the *bound* state.

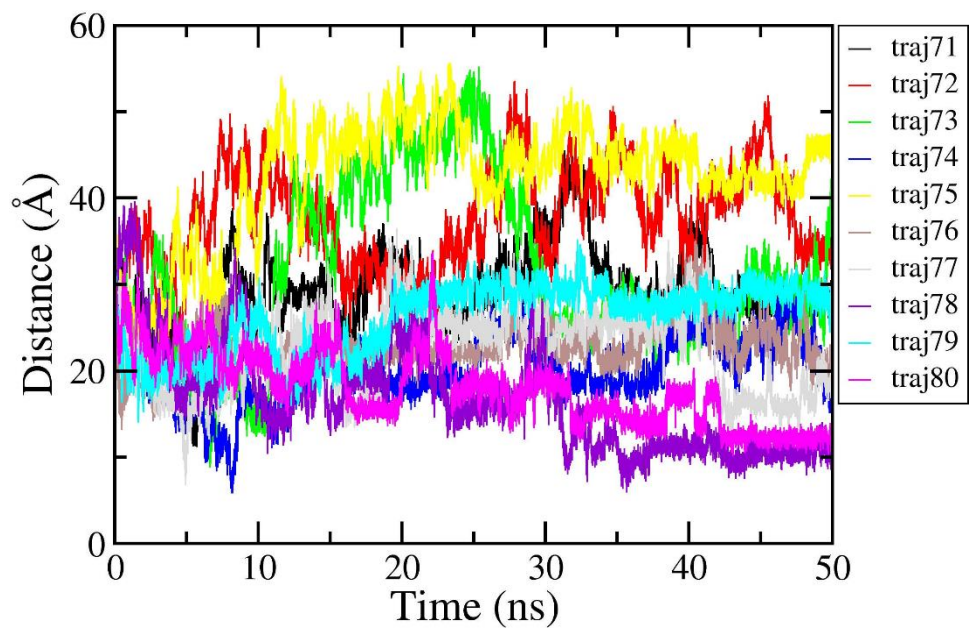

**Figure S17.** The minimum distance  $d_{SY-CN}$  between the nitrile group of PF-07321332 and the sulfur atom of the residue Cys145. The results were obtained due to analyzing trajectories 71-80. When the distance is smaller than 4.5 Å, the ligand reached the *bound* state.

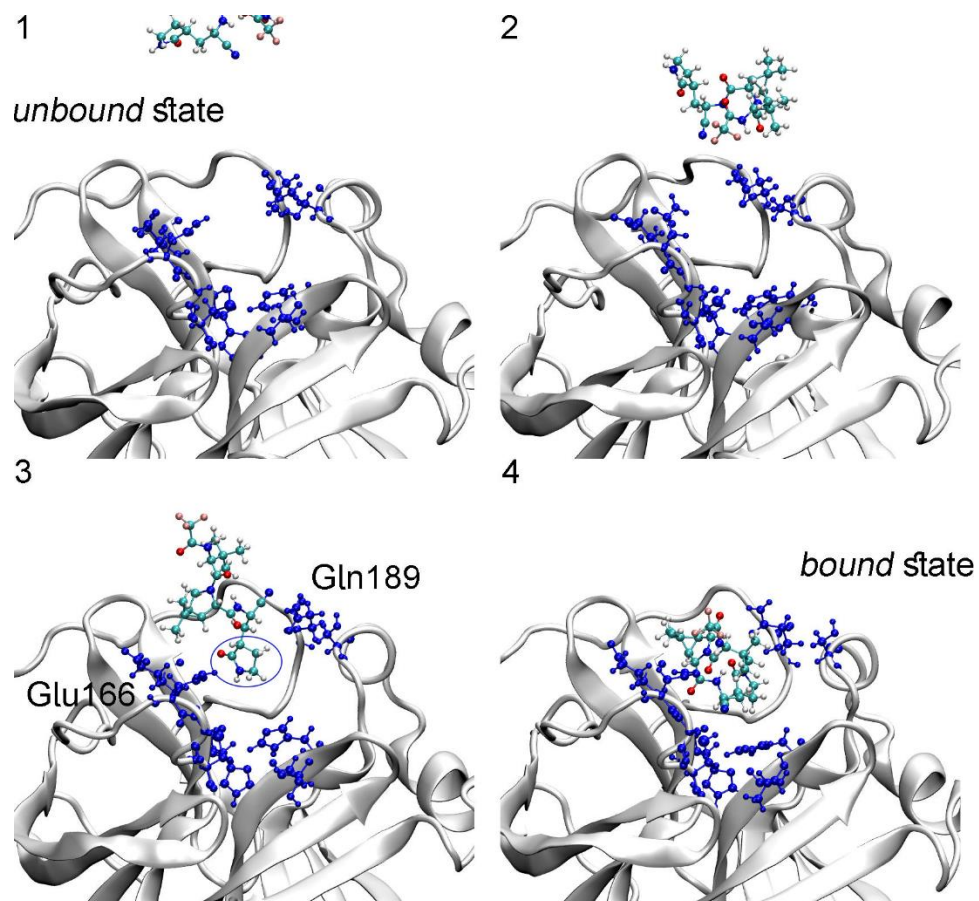

**Figure S18.** The binding pathway of PF-07321332 to SARS-CoV-2 Mpro over the trajectory 0. The results were obtained via the clustering analysis within a cutoff of 1.2 Å over the first 50 ns of the SMD trajectory. Two *unbound* clusters were not presented in the figure. The ligand mobilizes from *unbound* state **1** to *bound* state **4** with two *transition* states **2** and **3**. In particular, the pyrrolidinyl group of the ligand (noted with an ellipse) first inserted itself into the space between the residues Glu166 and Gln189, then the whole of the compound fully inserted into the binding pocket of SARS-CoV-2 Mpro.

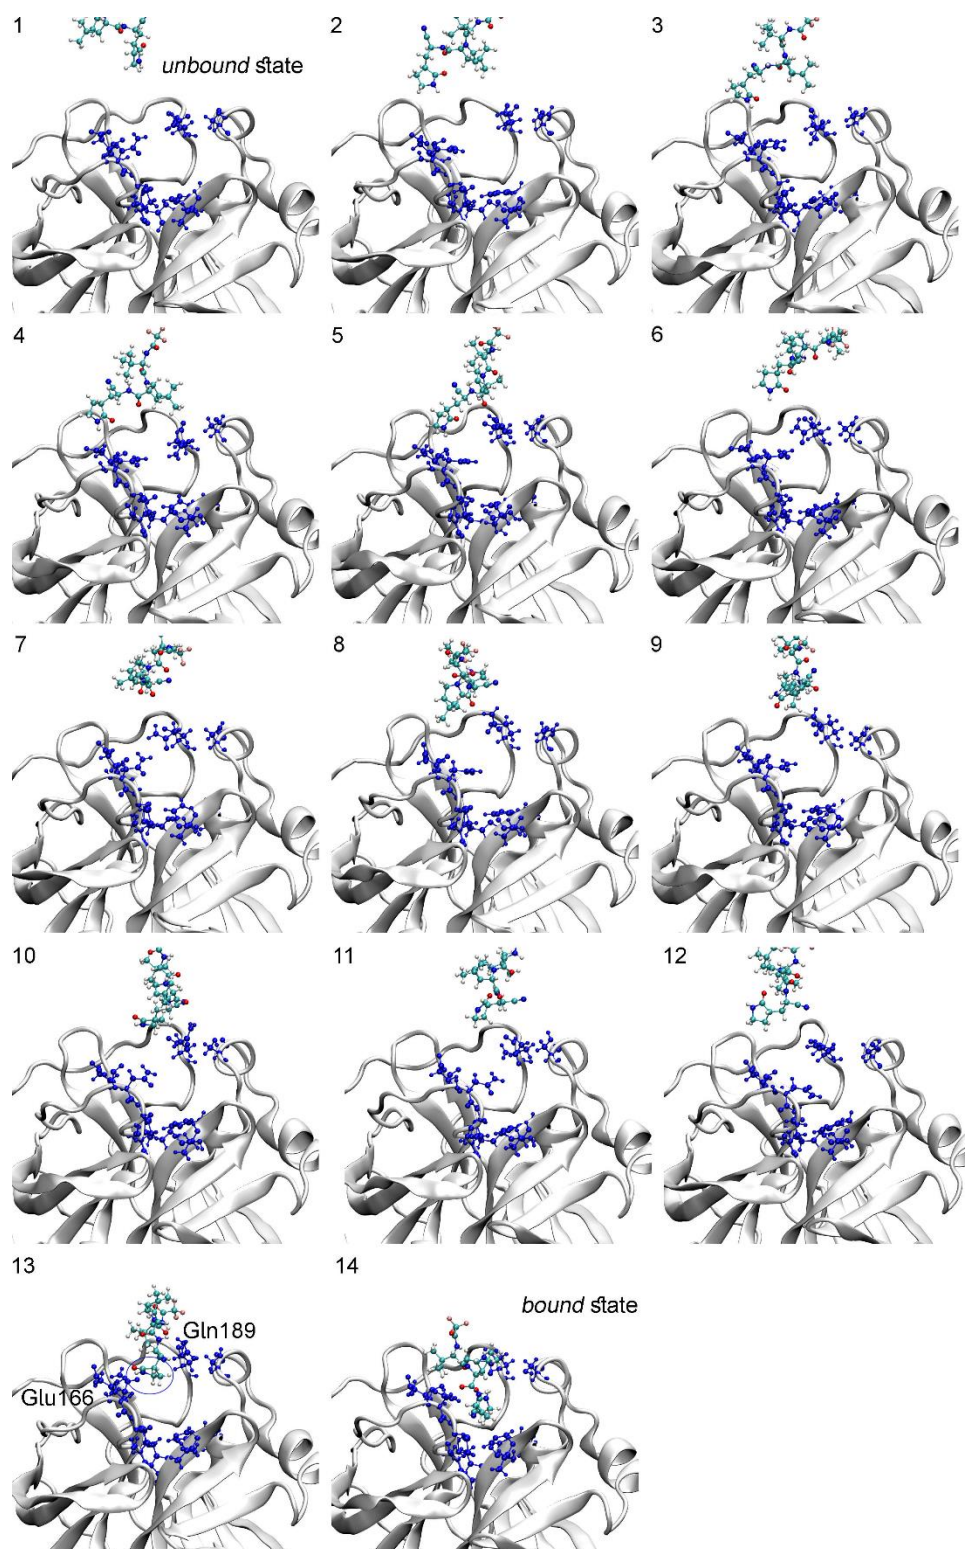

**Figure S19.** The binding pathway of PF-07321332 to SARS-CoV-2 Mpro over the trajectory 20. The results were obtained via the clustering analysis within a cutoff of 1.2 Å over the first 50 ns of the SMD trajectory. Two *unbound* clusters were not presented in the figure. The ligand mobilizes from *unbound* state 1 to

*bound* state **14** with twelve *transition* states from **2** to **13**. In particular, interestingly, the pyrrolidinyll group of the ligand (noted with an ellipse) first inserted itself into the space between the residues Glu166 and Gln189, then the whole of the compound fully inserted into the binding pocket of SARS-CoV-2 Mpro.

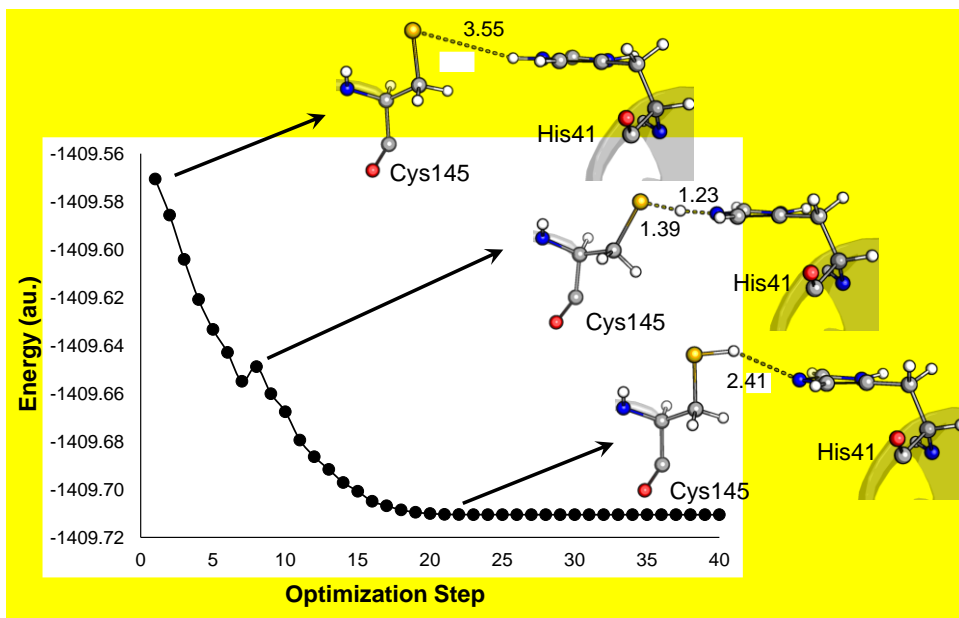

**Figure S20.** The optimization starting from ion-pair Cys145<sup>-</sup>-His41H<sup>+</sup>.

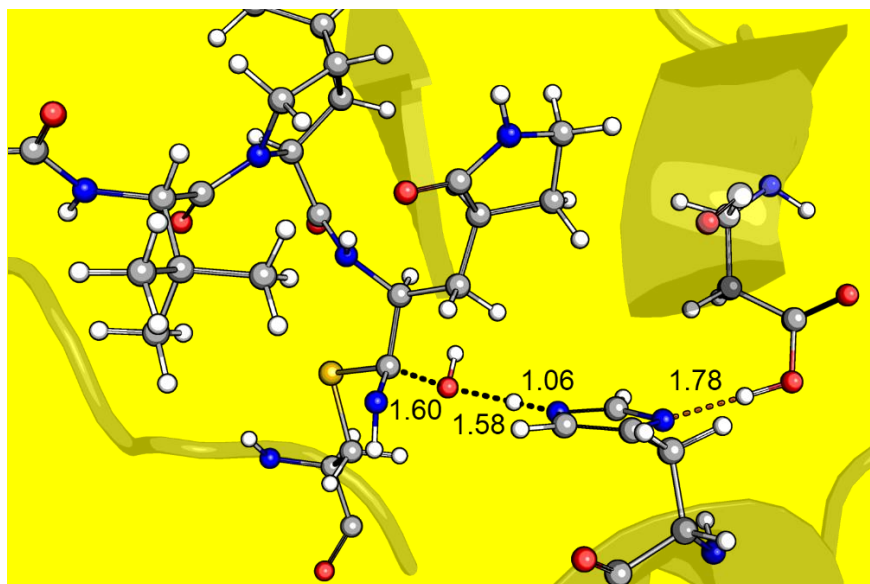

**Figure S21.** Optimized transition state for the hydrolysis of Int-3.

## Energy and Cartesian Coordinate

### Int-1

|                               |                |
|-------------------------------|----------------|
| B3LYP-D3(BJ) SCF energy (au)  | -1638.23497615 |
| B3LYP-D3(BJ) enthalpy (au)    | -1629.55549115 |
| B3LYP-D3(BJ) free energy (au) | -1630.61997015 |
| M06-2X SCF energy (au)        | -1638.05661166 |
| M06-2X enthalpy (au)          | -1629.37712666 |
| M06-2X free energy (au)       | -1630.44160566 |

### Cartesian coordinates

| ATOM | X         | Y         | Z         |
|------|-----------|-----------|-----------|
| C    | 70.915329 | 42.942291 | 41.548508 |
| H    | 71.228363 | 42.893314 | 42.598576 |
| H    | 70.675339 | 43.990105 | 41.329891 |
| C    | 69.678757 | 42.129425 | 41.340706 |
| N    | 68.694824 | 42.536613 | 40.463619 |
| H    | 68.686905 | 43.484825 | 39.961918 |
| C    | 67.693459 | 41.623493 | 40.548470 |
| H    | 66.774841 | 41.718979 | 39.989101 |
| N    | 67.982643 | 40.623184 | 41.373798 |
| C    | 69.227325 | 40.942966 | 41.883255 |
| H    | 69.715965 | 40.310196 | 42.613876 |
| C    | 66.642220 | 36.912037 | 41.234039 |
| H    | 67.545242 | 36.413811 | 41.585087 |
| H    | 66.899879 | 37.592152 | 40.419720 |
| S    | 65.870216 | 37.888058 | 42.585045 |
| H    | 66.484421 | 39.064880 | 42.267178 |
| C    | 66.941711 | 45.382915 | 40.573418 |
| H    | 67.248413 | 44.487537 | 41.125359 |
| H    | 66.132813 | 45.060623 | 39.903893 |
| C    | 68.120125 | 45.892696 | 39.695503 |
| O    | 68.169136 | 47.093033 | 39.353413 |
| O    | 68.940231 | 44.986633 | 39.311420 |
| C    | 67.540733 | 38.865330 | 45.598957 |
| N    | 68.335243 | 38.025715 | 45.703857 |
| O    | 63.896214 | 39.269794 | 46.322742 |
| C    | 64.624931 | 39.931084 | 47.045002 |
| N    | 65.938126 | 40.202740 | 46.801746 |
| O    | 67.174049 | 42.644680 | 47.564034 |
| N    | 66.442589 | 44.489296 | 46.390774 |
| C    | 66.732101 | 43.171116 | 46.542465 |
| C    | 66.555832 | 39.961288 | 45.506123 |
| C    | 67.220200 | 41.238346 | 44.923351 |
| C    | 66.384560 | 42.485920 | 45.213081 |
| C    | 66.459183 | 43.653732 | 44.216679 |
| C    | 65.951057 | 44.842022 | 45.060349 |
| H    | 66.404434 | 40.865200 | 47.422573 |
| H    | 66.367432 | 45.089481 | 47.209846 |

|   |           |           |           |
|---|-----------|-----------|-----------|
| H | 65.749779 | 39.632214 | 44.842693 |
| H | 67.340714 | 41.096527 | 43.845009 |
| H | 68.220406 | 41.360947 | 45.349812 |
| H | 65.328468 | 42.193649 | 45.303959 |
| H | 65.869080 | 43.486660 | 43.313927 |
| H | 67.497108 | 43.825352 | 43.911865 |
| H | 64.852966 | 44.902805 | 45.046555 |
| H | 66.349709 | 45.807125 | 44.742680 |

#### TS-1

|                               |                |
|-------------------------------|----------------|
| B3LYP-D3(BJ) SCF energy (au)  | -1638.23093803 |
| B3LYP-D3(BJ) enthalpy (au)    | -1629.55622703 |
| B3LYP-D3(BJ) free energy (au) | -1630.61713203 |
| M06-2X SCF energy (au)        | -1638.05430941 |
| M06-2X enthalpy (au)          | -1629.37959841 |
| M06-2X free energy (au)       | -1630.44050341 |

#### Cartesian coordinates

| ATOM | X         | Y         | Z         |
|------|-----------|-----------|-----------|
| C    | 70.969643 | 42.950951 | 41.585014 |
| H    | 71.291237 | 42.854134 | 42.630474 |
| H    | 70.772064 | 44.016636 | 41.413910 |
| C    | 69.701714 | 42.190250 | 41.355331 |
| N    | 68.733543 | 42.644718 | 40.482922 |
| H    | 68.747581 | 43.812752 | 39.890305 |
| C    | 67.740356 | 41.723606 | 40.551830 |
| H    | 66.819588 | 41.823898 | 39.992638 |
| N    | 68.007385 | 40.690407 | 41.357361 |
| C    | 69.250114 | 40.990482 | 41.876266 |
| H    | 69.742287 | 40.333595 | 42.584717 |
| C    | 66.722511 | 36.895283 | 41.211250 |
| H    | 67.579247 | 36.363644 | 41.624847 |
| H    | 67.052086 | 37.503822 | 40.366528 |
| S    | 65.970901 | 38.005955 | 42.461334 |
| H    | 66.645363 | 39.140446 | 42.080364 |
| C    | 66.878746 | 45.320534 | 40.607388 |
| H    | 67.185684 | 44.430180 | 41.164429 |
| H    | 66.074631 | 44.990955 | 39.937561 |
| C    | 68.043159 | 45.820923 | 39.732777 |
| O    | 68.117935 | 46.993328 | 39.342819 |
| O    | 68.893906 | 44.904015 | 39.357639 |
| C    | 67.319977 | 38.433636 | 45.661034 |
| N    | 67.938965 | 37.463646 | 45.813503 |
| O    | 63.852913 | 39.158970 | 46.323811 |
| C    | 64.605568 | 39.797916 | 47.042152 |
| N    | 65.921951 | 40.025169 | 46.797344 |
| O    | 67.503883 | 42.094707 | 47.764759 |
| N    | 67.424065 | 44.098694 | 46.653198 |

|   |           |           |           |
|---|-----------|-----------|-----------|
| C | 67.326736 | 42.752598 | 46.738625 |
| C | 66.564308 | 39.698277 | 45.536339 |
| C | 67.504135 | 40.832138 | 45.042965 |
| C | 66.959564 | 42.232903 | 45.340504 |
| C | 67.464340 | 43.370445 | 44.430687 |
| C | 67.303101 | 44.636944 | 45.304989 |
| H | 66.441414 | 40.612991 | 47.452286 |
| H | 67.506958 | 44.648624 | 47.506130 |
| H | 65.764458 | 39.537815 | 44.806835 |
| H | 67.640472 | 40.711445 | 43.964542 |
| H | 68.487831 | 40.724995 | 45.511185 |
| H | 65.860519 | 42.212742 | 45.301670 |
| H | 66.920929 | 43.434795 | 43.486645 |
| H | 68.519638 | 43.212021 | 44.185692 |
| H | 66.328194 | 45.120365 | 45.153915 |
| H | 68.086113 | 45.377975 | 45.128632 |

### Int-2

|                               |                |
|-------------------------------|----------------|
| B3LYP-D3(BJ) SCF energy (au)  | -1638.23353145 |
| B3LYP-D3(BJ) enthalpy (au)    | -1629.55468145 |
| B3LYP-D3(BJ) free energy (au) | -1630.61802645 |
| M06-2X SCF energy (au)        | -1638.05519724 |
| M06-2X enthalpy (au)          | -1629.37634724 |
| M06-2X free energy (au)       | -1630.43969224 |

### Cartesian coordinates

| ATOM | X         | Y         | Z         |
|------|-----------|-----------|-----------|
| C    | 70.966667 | 42.921268 | 41.602394 |
| H    | 71.293861 | 42.813686 | 42.645752 |
| H    | 70.774429 | 43.991482 | 41.448547 |
| C    | 69.692726 | 42.168537 | 41.370636 |
| N    | 68.728394 | 42.628155 | 40.495384 |
| H    | 68.772797 | 44.098324 | 39.725163 |
| C    | 67.745544 | 41.699013 | 40.578274 |
| H    | 66.820633 | 41.783222 | 40.020012 |
| N    | 68.009308 | 40.662544 | 41.390724 |
| C    | 69.251358 | 40.967979 | 41.904804 |
| H    | 69.747925 | 40.315849 | 42.615582 |
| C    | 66.753296 | 36.892654 | 41.203617 |
| H    | 67.597519 | 36.346573 | 41.624775 |
| H    | 67.099831 | 37.483597 | 40.352852 |
| S    | 66.024940 | 38.036945 | 42.435947 |
| H    | 66.734589 | 39.157406 | 42.045708 |
| C    | 66.897881 | 45.353340 | 40.585609 |
| H    | 67.258995 | 44.466995 | 41.115566 |
| H    | 66.097702 | 44.998947 | 39.924450 |
| C    | 68.008774 | 45.919151 | 39.705299 |
| O    | 68.073723 | 47.085403 | 39.327213 |



O 68.898979 45.033211 39.274395  
 C 67.313866 38.407356 45.673534  
 N 67.932854 37.439304 45.837807  
 O 63.843307 39.148808 46.328403  
 C 64.599960 39.786957 47.043419  
 N 65.916725 40.007843 46.797089  
 O 67.504890 42.076008 47.758587  
 N 67.439003 44.074272 46.637127  
 C 67.333687 42.728664 46.728230  
 C 66.560173 39.671947 45.538342  
 C 67.503922 40.800068 45.039669  
 C 66.966553 42.204487 45.332176  
 C 67.481613 43.333241 44.416874  
 C 67.336098 44.606426 45.285217  
 H 66.438240 40.595318 47.450520  
 H 67.531441 44.626553 47.487431  
 H 65.762054 39.507915 44.807884  
 H 67.638191 40.676563 43.961201  
 H 68.488144 40.690884 45.506294  
 H 65.867470 42.190594 45.290897  
 H 66.936470 43.395592 43.473637  
 H 68.533440 43.160564 44.167343  
 H 66.370834 45.106739 45.126160  
 H 68.133560 45.332787 45.110210

#### TS-2

|                               |                |
|-------------------------------|----------------|
| B3LYP-D3(BJ) SCF energy (au)  | -1638.22885522 |
| B3LYP-D3(BJ) enthalpy (au)    | -1629.55304822 |
| B3LYP-D3(BJ) free energy (au) | -1630.61495122 |
| M06-2X SCF energy (au)        | -1638.05015893 |
| M06-2X enthalpy (au)          | -1629.37435193 |
| M06-2X free energy (au)       | -1630.43625493 |

#### Cartesian coordinates

| ATOM | X         | Y         | Z         |
|------|-----------|-----------|-----------|
| C    | 70.879265 | 42.815006 | 41.612267 |
| H    | 71.186348 | 42.692822 | 42.658928 |
| H    | 70.661331 | 43.882294 | 41.476891 |
| C    | 69.627472 | 42.038841 | 41.341454 |
| N    | 68.661873 | 42.509525 | 40.467579 |
| H    | 68.727951 | 44.054901 | 39.688564 |
| C    | 67.688248 | 41.582645 | 40.510777 |
| H    | 66.761581 | 41.656433 | 39.959167 |
| N    | 67.977531 | 40.532314 | 41.301075 |
| C    | 69.206604 | 40.823532 | 41.848080 |
| H    | 69.680473 | 40.155773 | 42.555775 |
| C    | 66.845787 | 36.957184 | 41.166805 |
| H    | 67.617950 | 36.378513 | 41.679726 |

H 67.294983 37.401714 40.271793  
 S 66.200859 38.303528 42.235378  
 H 67.161270 39.519325 41.699863  
 C 66.907944 45.321491 40.616329  
 H 67.274170 44.440052 41.151012  
 H 66.098938 44.961735 39.968521  
 C 68.006813 45.879219 39.719582  
 O 68.091888 47.045128 39.351898  
 O 68.877502 44.979675 39.263584  
 C 67.472054 38.473579 45.605633  
 N 68.209763 37.593300 45.773849  
 O 63.838028 39.091908 46.294422  
 C 64.608368 39.708084 47.012707  
 N 65.931610 39.904930 46.766525  
 O 67.377365 42.202682 47.591335  
 N 66.802574 44.129921 46.471401  
 C 66.978088 42.787643 46.585632  
 C 66.554649 39.623402 45.480831  
 C 67.307060 40.862656 44.920719  
 C 66.574562 42.168121 45.239601  
 C 66.752876 43.354355 44.274708  
 C 66.349998 44.560108 45.152470  
 H 66.440063 40.512489 47.408298  
 H 66.825371 44.717609 47.303104  
 H 65.759262 39.334270 44.787041  
 H 67.405411 40.733250 43.840961  
 H 68.317757 40.905346 45.338917  
 H 65.496773 41.963848 45.315536  
 H 66.146324 43.260113 43.371647  
 H 67.801689 43.441807 43.969337  
 H 65.261673 44.720028 45.137001  
 H 66.834709 45.495827 44.868496

**Int-3**

|                               |                |
|-------------------------------|----------------|
| B3LYP-D3(BJ) SCF energy (au)  | -1638.23304493 |
| B3LYP-D3(BJ) enthalpy (au)    | -1629.55188193 |
| B3LYP-D3(BJ) free energy (au) | -1630.61433293 |
| M06-2X SCF energy (au)        | -1638.05534309 |
| M06-2X enthalpy (au)          | -1629.37418009 |
| M06-2X free energy (au)       | -1630.43663109 |

Cartesian coordinates

| ATOM | X         | Y         | Z         |
|------|-----------|-----------|-----------|
| C    | 70.955132 | 42.903286 | 41.571533 |
| H    | 71.260788 | 42.786293 | 42.618317 |
| H    | 70.754951 | 43.971687 | 41.422470 |
| C    | 69.692467 | 42.145618 | 41.307644 |
| N    | 68.744743 | 42.612335 | 40.408413 |

H 68.797737 44.212200 39.624233  
C 67.755760 41.714970 40.446285  
H 66.831970 41.780106 39.891865  
N 68.035233 40.682667 41.266384  
C 69.256721 40.950035 41.837666  
H 69.694794 40.280144 42.563091  
C 66.842674 36.936157 41.194614  
H 67.598824 36.344307 41.719852  
H 67.316910 37.341206 40.290897  
S 66.228546 38.318371 42.242359  
H 67.376968 39.856678 41.550983  
C 66.940643 45.389267 40.584576  
H 67.331573 44.509705 41.103470  
H 66.140724 45.020981 39.930332  
C 68.018761 45.999821 39.699802  
O 68.071060 47.171127 39.352489  
O 68.921387 45.138527 39.221668  
C 67.505386 38.415985 45.649250  
N 68.268044 37.563263 45.846600  
O 63.824043 39.063576 46.305065  
C 64.605148 39.663956 47.024078  
N 65.933357 39.833195 46.782890  
O 67.389229 42.147018 47.579494  
N 66.780037 44.061684 46.455791  
C 66.970291 42.720451 46.576092  
C 66.560944 39.540440 45.501503  
C 67.290756 40.784798 44.920486  
C 66.554863 42.088394 45.238842  
C 66.715126 43.270950 44.265621  
C 66.310036 44.478939 45.139179  
H 66.445793 40.433758 47.426823  
H 66.811081 44.657185 47.281574  
H 65.778435 39.220310 44.805470  
H 67.363670 40.633739 43.842258  
H 68.309090 40.841679 45.318863  
H 65.479370 41.878342 45.326382  
H 66.100449 43.167488 43.368816  
H 67.761246 43.366909 43.952354  
H 65.220078 44.628025 45.132629  
H 66.782715 45.417320 44.842545

**TS-3**

|                               |                |
|-------------------------------|----------------|
| B3LYP-D3(BJ) SCF energy (au)  | -1714.64906809 |
| B3LYP-D3(BJ) enthalpy (au)    | -1705.94374809 |
| B3LYP-D3(BJ) free energy (au) | -1707.00735809 |
| M06-2X SCF energy (au)        | -1714.47313992 |
| M06-2X enthalpy (au)          | -1705.76781992 |
| M06-2X free energy (au)       | -1706.83142992 |

Cartesian coordinates

| ATOM | X         | Y         | Z         |
|------|-----------|-----------|-----------|
| C    | 71.314636 | 43.233864 | 41.408207 |
| H    | 71.572327 | 43.038780 | 42.455410 |
| H    | 71.295097 | 44.323109 | 41.281998 |
| C    | 69.968491 | 42.681591 | 41.065533 |
| N    | 69.194984 | 43.240181 | 40.054115 |
| H    | 69.134857 | 44.847050 | 39.455044 |
| C    | 68.165154 | 42.407101 | 39.902958 |
| H    | 67.344109 | 42.554665 | 39.215794 |
| N    | 68.244408 | 41.349934 | 40.729900 |
| C    | 69.379097 | 41.510441 | 41.486465 |
| H    | 69.638443 | 40.779007 | 42.239029 |
| C    | 66.589958 | 36.308701 | 42.304485 |
| H    | 67.376488 | 35.679211 | 42.726898 |
| H    | 67.020287 | 37.046852 | 41.629940 |
| S    | 65.695648 | 37.184879 | 43.659088 |
| H    | 67.674873 | 40.414845 | 40.722038 |
| C    | 67.110878 | 45.652058 | 40.504322 |
| H    | 67.632637 | 44.809139 | 40.960365 |
| H    | 66.364090 | 45.213234 | 39.829563 |
| C    | 68.065216 | 46.475262 | 39.649849 |
| O    | 67.927925 | 47.657291 | 39.373360 |
| O    | 69.078796 | 45.804848 | 39.098309 |
| C    | 66.936378 | 38.659962 | 43.875938 |
| N    | 67.897369 | 38.874023 | 43.120361 |
| O    | 63.987579 | 38.756958 | 46.023449 |
| C    | 64.868553 | 39.270599 | 46.696877 |
| N    | 66.145447 | 39.487701 | 46.266479 |
| O    | 67.749725 | 41.694355 | 47.534401 |
| N    | 67.375427 | 43.880421 | 46.890877 |
| C    | 67.338135 | 42.525482 | 46.730251 |
| C    | 66.384323 | 39.747208 | 44.833790 |
| C    | 67.238472 | 41.013687 | 44.658859 |
| C    | 66.685989 | 42.247314 | 45.376209 |
| C    | 66.861671 | 43.588360 | 44.642029 |
| C    | 66.813278 | 44.631516 | 45.775383 |
| H    | 66.739227 | 40.004017 | 46.915863 |
| H    | 67.523628 | 44.286701 | 47.813335 |
| H    | 65.388245 | 39.955460 | 44.427315 |
| H    | 67.300064 | 41.210041 | 43.587929 |
| H    | 68.265030 | 40.814957 | 44.981606 |
| H    | 65.615913 | 42.106140 | 45.592503 |
| H    | 66.103828 | 43.763744 | 43.875523 |
| H    | 67.844513 | 43.612740 | 44.156761 |
| H    | 65.782867 | 44.954613 | 45.986847 |
| H    | 67.413109 | 45.521461 | 45.564629 |

O 67.109093 39.022205 40.798870  
H 67.668999 38.758923 41.886559  
H 66.258095 39.269466 41.234955

#### Int-4

|                               |                |
|-------------------------------|----------------|
| B3LYP-D3(BJ) SCF energy (au)  | -1714.69028153 |
| B3LYP-D3(BJ) enthalpy (au)    | -1705.97948053 |
| B3LYP-D3(BJ) free energy (au) | -1707.04677453 |
| M06-2X SCF energy (au)        | -1714.51954544 |
| M06-2X enthalpy (au)          | -1705.80874444 |
| M06-2X free energy (au)       | -1706.87603844 |

#### Cartesian coordinates

| ATOM | X         | Y         | Z         |
|------|-----------|-----------|-----------|
| C    | 71.416008 | 43.328289 | 41.379482 |
| H    | 71.742332 | 43.229843 | 42.422745 |
| H    | 71.375496 | 44.403027 | 41.160950 |
| C    | 70.057961 | 42.736832 | 41.181324 |
| N    | 69.193039 | 43.190903 | 40.200695 |
| H    | 69.123634 | 44.700809 | 39.520779 |
| C    | 68.153542 | 42.329041 | 40.262596 |
| H    | 67.273178 | 42.420567 | 39.635136 |
| N    | 68.290276 | 41.352112 | 41.170181 |
| C    | 69.502548 | 41.612312 | 41.763687 |
| H    | 69.898727 | 40.975052 | 42.546631 |
| C    | 66.643051 | 36.272724 | 42.321838 |
| H    | 67.373795 | 35.593407 | 42.771317 |
| H    | 67.109604 | 37.060406 | 41.719753 |
| S    | 65.632645 | 37.113792 | 43.617935 |
| H    | 68.394386 | 37.034039 | 44.013775 |
| C    | 67.068886 | 45.601994 | 40.450546 |
| H    | 67.537758 | 44.731308 | 40.912369 |
| H    | 66.309906 | 45.205948 | 39.764011 |
| C    | 68.084618 | 46.373806 | 39.618008 |
| O    | 67.983574 | 47.557522 | 39.317940 |
| O    | 69.095200 | 45.666077 | 39.124798 |
| C    | 66.899666 | 38.168087 | 44.375885 |
| N    | 68.145676 | 37.930138 | 44.437805 |
| O    | 63.920540 | 38.668640 | 46.103443 |
| C    | 64.764343 | 39.261833 | 46.763786 |
| N    | 66.043549 | 39.478924 | 46.361710 |
| O    | 67.651283 | 41.571575 | 47.447582 |
| N    | 67.419525 | 43.704922 | 46.616219 |
| C    | 67.367104 | 42.350922 | 46.538536 |
| C    | 66.364197 | 39.499508 | 44.930485 |
| C    | 67.345039 | 40.639721 | 44.601933 |
| C    | 66.874168 | 42.000835 | 45.128567 |
| C    | 67.301437 | 43.245705 | 44.326176 |

C 67.174255 44.393600 45.353909  
 H 66.634171 40.045120 46.975140  
 H 67.562889 44.174313 47.507839  
 H 65.416969 39.697277 44.426289  
 H 67.445313 40.685707 43.512833  
 H 68.333046 40.395340 45.000549  
 H 65.774811 42.000439 45.200680  
 H 66.697372 43.406841 43.431705  
 H 68.340851 43.139645 43.997459  
 H 66.174118 44.850281 45.338276  
 H 67.913834 45.185249 45.206921  
 O 66.974304 38.951344 41.018467  
 H 67.532860 39.781742 41.073582  
 H 66.205460 39.248974 41.558372

**TS-4**

|                               |                |
|-------------------------------|----------------|
| B3LYP-D3(BJ) SCF energy (au)  | -1714.63270762 |
| B3LYP-D3(BJ) enthalpy (au)    | -1705.92355662 |
| B3LYP-D3(BJ) free energy (au) | -1706.98846362 |
| M06-2X SCF energy (au)        | -1714.45721790 |
| M06-2X enthalpy (au)          | -1705.74806690 |
| M06-2X free energy (au)       | -1706.81297390 |

Cartesian coordinates

| ATOM | X         | Y         | Z         |
|------|-----------|-----------|-----------|
| C    | 71.378471 | 43.329632 | 41.386139 |
| H    | 71.701477 | 43.260509 | 42.431103 |
| H    | 71.286156 | 44.395943 | 41.147930 |
| C    | 70.051796 | 42.673180 | 41.194397 |
| N    | 69.168625 | 43.084007 | 40.202785 |
| H    | 69.081375 | 44.712410 | 39.489670 |
| C    | 68.143036 | 42.234329 | 40.274429 |
| H    | 67.243690 | 42.284966 | 39.674461 |
| N    | 68.343178 | 41.289787 | 41.214775 |
| C    | 69.541771 | 41.561649 | 41.824635 |
| H    | 69.891457 | 40.943295 | 42.639576 |
| C    | 66.469124 | 36.558502 | 41.952625 |
| H    | 67.407631 | 36.071705 | 42.229660 |
| H    | 66.691185 | 37.384991 | 41.274094 |
| S    | 65.617874 | 37.237309 | 43.440247 |
| H    | 68.664467 | 37.929394 | 43.284588 |
| C    | 67.083275 | 45.593975 | 40.523846 |
| H    | 67.575760 | 44.741402 | 40.995373 |
| H    | 66.323242 | 45.172337 | 39.852943 |
| C    | 68.067726 | 46.372169 | 39.663094 |
| O    | 67.970016 | 47.552589 | 39.368526 |
| O    | 69.066589 | 45.661476 | 39.126808 |
| C    | 67.028862 | 38.836533 | 43.698917 |

N 68.268837 38.561596 43.982742  
O 63.947559 38.891720 45.827946  
C 64.862373 39.372383 46.479679  
N 66.123131 39.600113 46.010216  
O 67.699959 41.894485 47.330112  
N 67.141029 44.057907 46.736259  
C 67.195770 42.701466 46.558620  
C 66.332939 39.902920 44.584713  
C 67.126091 41.215523 44.475716  
C 66.504639 42.390938 45.231800  
C 66.523888 43.751507 44.517204  
C 66.440414 44.766724 45.672817  
H 66.751335 40.065361 46.662483  
H 67.285797 44.455963 47.663078  
H 65.325363 40.050049 44.190941  
H 67.193466 41.475193 43.420605  
H 68.145599 41.025127 44.822544  
H 65.463364 42.152645 45.494877  
H 65.715164 43.869682 43.791988  
H 67.477425 43.869305 43.989414  
H 65.396164 44.979767 45.948196  
H 66.932777 45.715984 45.444298  
O 66.812393 39.387726 42.214821  
H 67.687889 40.530567 41.571617  
H 65.893867 39.748531 42.199726
